# Supplementary material for: Evaluation of Hydroxyethyl Cellulose Grades as the Main Matrix Former to Produce 3D-Printed Controlled-Release Dosage Forms
Source: MDPI journal article supplement (doi:10.3390/pharmaceutics14102103), 2022-10-01
Supplement: s1 [file s1]

**Table 1.** Characterization of different matrix polymers in terms of extrusion temperatures (°C), screw speed (rpm), extrusion torque (Nm) and filament diameter deviation (mm).

| Polymer                                                                                                | Extrusion temperature<br>[°C] | Screw speed<br>[rpm] | Max. Torque<br>[Nm]     | Diameter deviation<br>[mm] |
|--------------------------------------------------------------------------------------------------------|-------------------------------|----------------------|-------------------------|----------------------------|
| <div>HEC L</div> 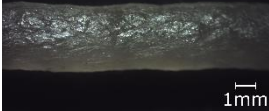     | 140                           | 10                   | Limit reached<br>(> 15) | > 0.05                     |
| <div>HEC G</div>      | 150                           | 5                    | Limit reached<br>(> 15) | > 0.05                     |
| <div>HEC M</div>      | 150                           | 5                    | Limit reached<br>(> 15) | > 0.05                     |
| <div>HEC HX</div>     | 155                           | 5                    | Limit reached<br>(> 15) | > 0.05                     |
| <div>HPC SSL</div>  | 130                           | 25                   | < 15                    | < 0.05                     |
